# Supplementary material
Source: PubMed Central journal article supplement (PMC5375986)
Supplement: ajtr0009-0910-f9.pdf [file ajtr0009-0910-f9.pdf]

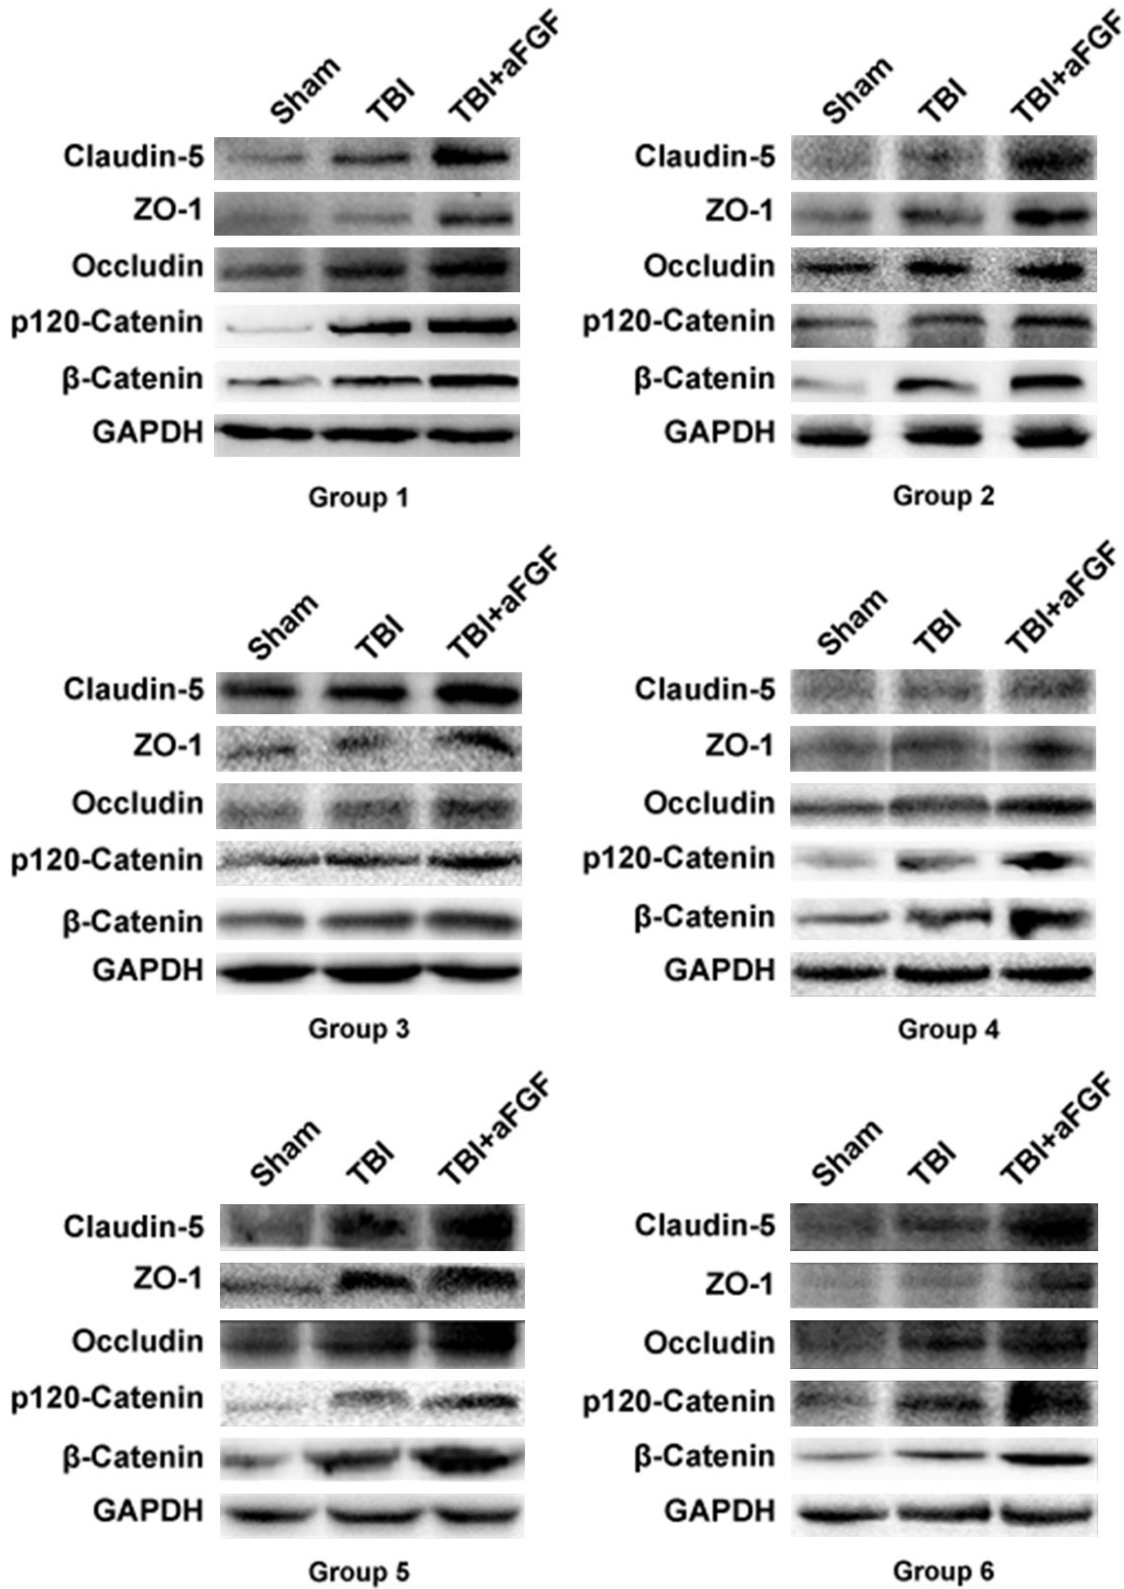

**Figure S1.** Level of TJ proteins (claudin-5, occludin, ZO-1) and AJ proteins (p120-catenin, β-catenin) expression of six mice following experimental TBI. aFGF administration attenuates the loss of the TJ proteins (claudin-5, occludin, ZO-1) and AJ proteins (p120-catenin β-catenin). GAPDH was used as a loading control and for band density normalization.

Blood-brain barrier integrity preserved by aFGF

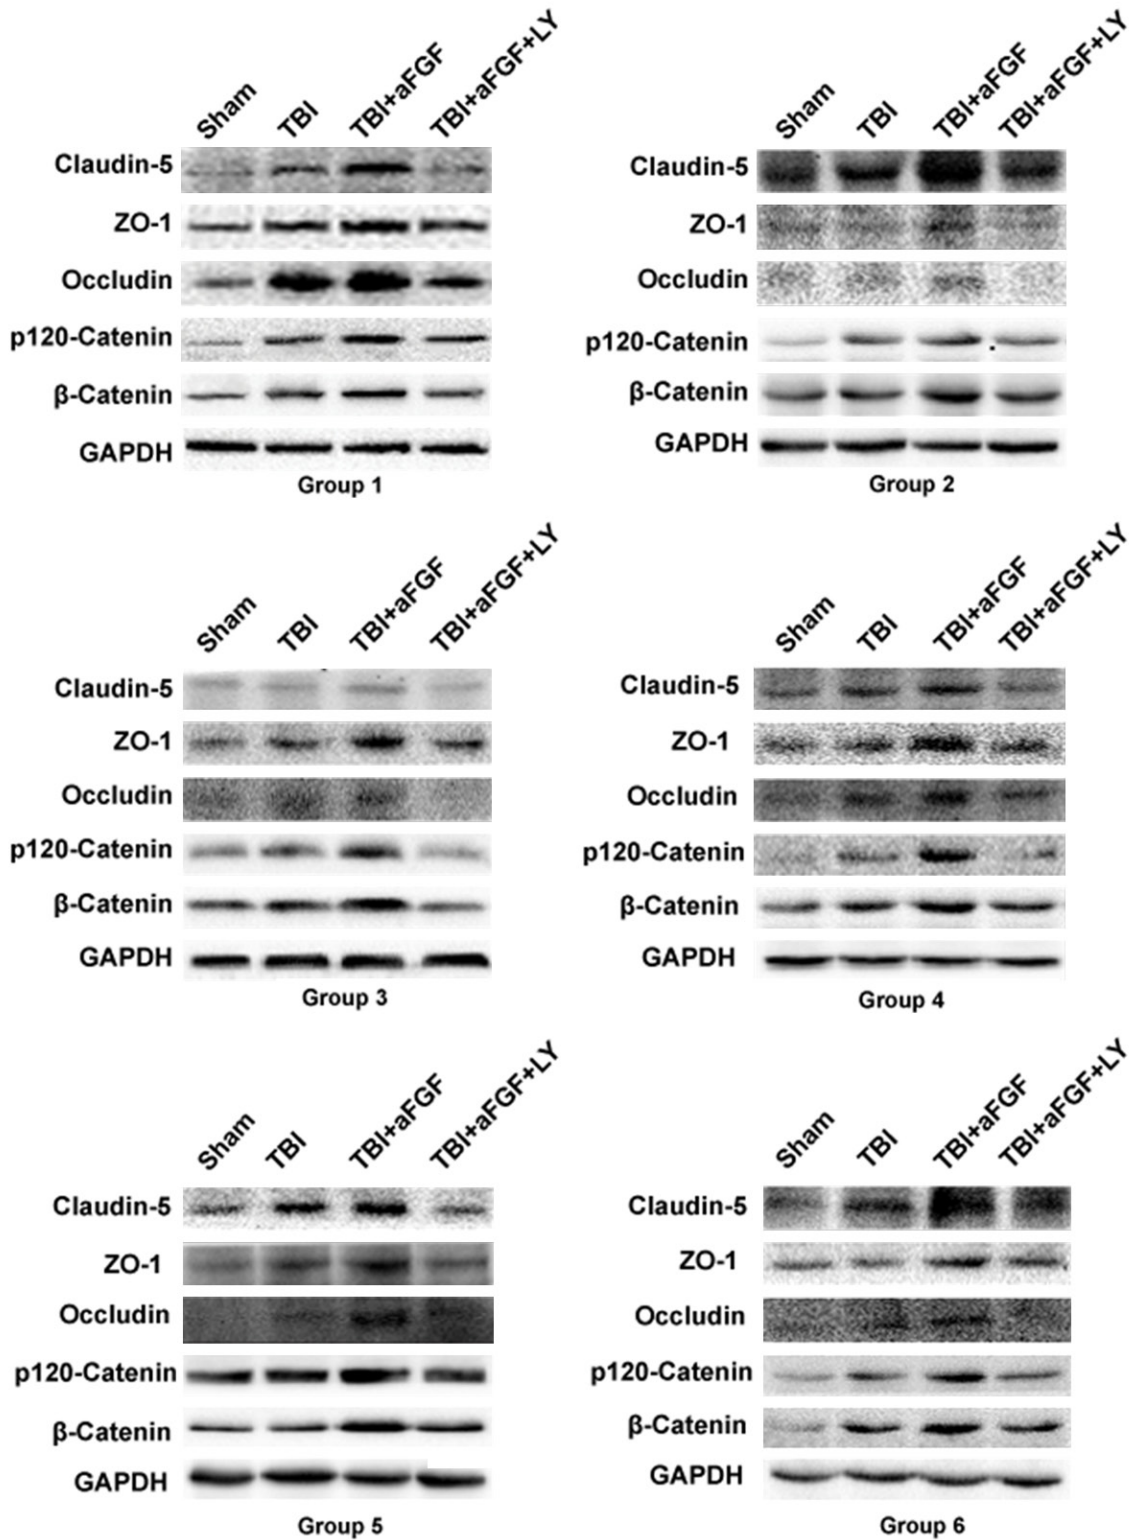

**Figure S2.** Level of TJ proteins (claudin-5, occludin, ZO-1) and AJ proteins (p120-catenin,  $\beta$ -catenin) expression of six mice following experimental TBI. Addition of the Akt inhibitor LY294002 reverses the effects of aFGF on the expression of the TJ proteins (claudin-5, occludin, ZO-1) and AJ proteins (p120-catenin,  $\beta$ -catenin) 24 h after TBI in mice. GAPDH was used as a loading control and for band density normalization.
